# Supplementary material for: New records of rove-beetles (Insecta, Coleoptera, Staphylinidae) for Azores Islands (Portugal)
Source: Biodivers Data J. 2022 Jul 19;10:e87672. doi: 10.3897/BDJ.10.e87672 (PMC9848514; doi:10.3897/BDJ.10.e87672)
Supplement: Supplementary material 3 — Updated Checklist of Azorean Staphylinidae [file bdj-10-e87672-s003.xlsx]

## Sheet: Sheet1
Species	CS (Assing, 2010)	CS (New proposal)	AZ	COR	FLO	FAI	PIC	GRA	SJG	TER	SMG	SMR	Synonym	Different combination	Misidentification	Emendation/Misspelling
Aleochara albopila (Mulsant & Rey, 1851)	Native	Non-endemic			1	1	1				1	1		Emplenota albopila (Mulsant & Rey); Polystoma albopila (Mulsant & Rey)
Aleochara bipustulata (Linnaeus, 1760)	Introduced	Non-endemic			1	1	1	1	1	1	1	1	Aleochara nitida Gravenhorst			Alcochara bipustulata (Linnareus)
Aleochara clavicornis L. Redtenbacher, 1849	Introduced	Non-endemic			1					1	1	1
Aleochara freyi Bernhauer, 1940	Endemic	Doubtfully endemic					1
Aleochara funebris Wollaston, 1864	Native	Non-endemic						1
Aleochara puberula Klug, 1833	Introduced	Non-endemic cosmopolitan				1				1	1	1
Aleochara verna Say, 1833	Introduced	Non-endemic								1		1
Aloconota gregaria (Erichson, 1839)	Introduced	Non-endemic	1
Aloconota insecta (Thomson, 1856)	Native	Non-endemic			1		1		1		1				Atheta (Aloconota) insecta Thomson
Aloconota sulcifrons (Stephens, 1832)	Native	Non-endemic cosmopolitan			1	1	1	1	1	1	1	1		Atheta (Aloconota) sulcifrons Stephens
Amischa analis (Gravenhorst, 1802)	Introduced	Non-endemic			1	1	1	1	1	1	1	1
Amischa forcipata Mulsant & Rey, 1873	Introduced	Non-endemic								1		1
Anotylus complanatus (Erichson, 1839)	Introduced	Non-endemic			1	1	1	1	1	1	1	1		Oxytelus (Anotylus) complanatus Erichson
Anotylus nitidifrons (Wollaston, 1871)	Introduced	Non-endemic			1	1	1	1	1	1	1	1		Oxytelus (Anotylus) nitidifrons Wollaston
Anotylus nitidulus (Gravenhorst, 1802)	Introduced	Non-endemic		1	1	1	1		1	1	1	1		Oxytelus (Anotylus) nitidulus Gravenhorst
Anotylus speculifrons (Kraatz, 1857)	Introduced	Non-endemic								1				Oxytelus speculifrons Kraatz
Astenus lyonessius (Joy, 1908)	Native	Non-endemic			1	1	1	1		1	1	1	Astenus longelytrata Palm		Sunius gracilis Paykull
Atheta aeneicollis (Sharp, 1869)	Introduced	Non-endemic				1	1	1		1	1	1
Atheta amicula (Stephens, 1832)	Introduced	Non-endemic			1	1			1	1	1	1
Atheta atramentaria (Gyllenhal, 1810)	Introduced	Non-endemic		1	1	1	1		1	1	1	1		Homolota atramentaria Gyllenhal
Atheta azorica Bernhauer, 1936	Endemic	Doubtfully endemic	1
Atheta castanoptera (Mannerheim, 1830)	Introduced	Non-endemic				1					1		Atheta (Hypatheta) pertyi Heer
Atheta divisa (Märkel, 1844)	Introduced	Non-endemic					1	1		1	1
Atheta floresensis Pace, 2004	Endemic	Endemic			1								Atheta (Geostibops) aptera Israelson, 1985
Atheta fungi (Gravenhorst, 1806)	Introduced	Non-endemic			1	1	1	1	1	1	1	1
Atheta luridipennis (Mannerheim, 1830)	Introduced	Non-endemic			1						1			Homalota luridipennis Mannerheim
Atheta mucronata (Kraatz, 1859)	Introduced	Non-endemic			1	1	1	1	1	1	1	1			Homalota putrescens Wollaston
Atheta nigra (Kraatz, 1856)	Introduced	Non-endemic			1					1	1	1			Atheta (Datomicra) zosterae Thomson; Atheta zosterae (auctt. nec Thomson )
Atheta oblita (Erichson, 1839)	Introduced	Non-endemic									1
Atheta palustris (Kiesenwetter, 1844)	Introduced	Non-endemic			1	1		1	1	1	1	1
Atheta pasadenae Bernhauer, 1906	Native	Non-endemic cosmopolitan			1	1	1	1	1	1	1	1			Atheta (Acrotona) laticollis Stephens; Atheta laticollis (Stephens); Atheta vernacula (Erichson 1839); Atheta maderense Likovsky; Atheta zealandica Cameron, 1945
Atheta ravilla (Erichson, 1839)	Native	Non-endemic						1	1		1	1	Atheta angusticollis (Thomson)
Atheta triangulum (Kraatz, 1856)	Introduced	Non-endemic							1
Bisnius sordidus (Gravenhorst, 1802)	Introduced	Non-endemic cosmopolitan			1	1	1			1	1		Philonthus pachycephalus Nordmann	Philonthus sordidus (Gravenhorst)
Bledius unicornis (Germar, 1825)	Introduced	Non-endemic								1
Cafius pruinosus (Erichson, 1840)	Introduced	Non-endemic			1		1					1		Remus pruinosus (Erichson, 1840)	Remus sericeus Holme
Cafius xantholoma (Gravenhorst, 1806)	Introduced	Non-endemic			1		1
Carpelimus bilineatus (Stephens, 1834)	Introduced	Non-endemic cosmopolitan			1	1			1	1	1	1	Trogophloeus riparius Lacordaire	Trogophloeus bilineatus Stephens		Trogophloeus bileatus Stephens
Carpelimus corticinus (Gravenhorst, 1806)	Native	Non-endemic			1	1	1	1	1	1	1	1		Trogophloeus corticinus Gravenhorst
Carpelimus gracilis (Mannerheim, 1830)	Introduced	Non-endemic				1								Trogophloeus gracilis Mannherheim
Carpelimus pusillus (Gravenhorst, 1802)	Introduced	Non-endemic			1					1	1	1		Trogophloeus pusillus Gravenhorst
Carpelimus subtilis (Erichson, 1839)	Introduced	Non-endemic				1								Trogophloeus subtilis Erichson
Carpelimus troglodytes troglodytes (Erichson, 1840)	Introduced	Non-endemic									1
Carpelimus zealandicus (Sharp, 1900)	Introduced	Non-endemic								1		1
Cilea silphoides (Linnaeus, 1767)	Introduced	Non-endemic			1	1	1			1		1		Leucoparyphus silphoides (Linnaeus)
Coproporus pulchellus (Erichson, 1839)	Introduced	Non-endemic			1	1	1	1	1	1	1	1	Tachyporus brevis Har.
Cordalia obscura (Gravenhorst, 1802)	Introduced	Non-endemic			1	1	1	1	1	1	1	1		Falagria obscura Gravenhorst
Creophilus maxillosus maxillosus (Linnaeus, 1758)	Introduced	Non-endemic			1	1	1	1	1	1	1	1		Staphylinus maxillosus Linnaeus
Cypha pulicaria (Erichson, 1839)	Introduced	Non-endemic			1		1					1
Cypha seminulum (Erichson, 1839)	Introduced	Non-endemic						1		1	1
Dalotia coriaria (Kraatz, 1856)	Introduced	Non-endemic cosmopolitan			1		1	1	1	1	1	1		Homalota coriaria Kraatz; Atheta coriaria (Kraatz, 1856)
Euconnus azoricus Franz, 1969	Endemic	Endemic					1			1	1
Euconnus campestris (L.W. Schaufuss, 1866)	Native	Non-endemic				1					1		Euconnus unicus lindbergi (Franz, 1962); Euconnus duboisi eksilis Vit, 1999
Euplectus infirmus Raffray, 1910	Introduced	Non-endemic				1	1	1		1	1	1			Euplectus afer (Raffray); Euplectus afer Reitter
Gabrius nigritulus (Gravenhorst, 1802)	Introduced	Non-endemic			1	1	1	1	1	1	1	1		Philonthus nigritulus Gravenhorst
Gabronthus thermarum (Aubé, 1850)	Introduced	Non-endemic									1			Philonthus thermarum Aubé
Geostiba melanocephala (Crotch, 1867)	Endemic	Doubtfully endemic									1			Sipalia (Ditroposipalia) melanocephala (Crotch); Sipalia melanocephala Crotch; Xenomma capillaricornis Gravenhorst		Xenomma capillaricornis Gravenhorst
Gyrohypnus fracticornis (Müller, 1776)	Introduced	Non-endemic			1	1	1	1	1	1	1	1			Gyrohypnus punctulatus Paykull; Xantholinus punctulatus Paykull
Gyrophaena bihamata Thomson, 1867	Introduced	Non-endemic										1
Habrocerus capillaricornis (Gravenhorst, 1806)	Native	Non-endemic					1		1	1	1
Halobrecta flavipes Thomson, 1861	Introduced	Non-endemic									1			Atheta (Halobrectha) flavipes Thomson	Homalota putrescens Wollaston
Heterota plumbea (Waterhouse, 1858)	Introduced	Non-endemic			1		1					1
Heterothops minutus Wollaston, 1860	Native	Non-endemic					1				1
Hydrosmecta longula (Heer, 1839)	Native	Non-endemic				1					1		Atheta (Hydrosmecta) thinobioides Kraatz			Hydrosmecta longula (Kraatz)
Hypomedon debilicornis (Wollaston, 1857)	Native	Non-endemic cosmopolitan			1	1	1			1	1	1		Chloecharis debilicornis (Wollaston); Lithocharis debilicornis Wollaston; Medon (Chloecharis) debilicornis Wollaston; Medon (Hypomedon) debilicornis Wollaston
Leptacinus pusillus (Stephens, 1833)	Introduced	Non-endemic									1	1			Leptacinus batychrus Gyllenhal
Lithocharis nigriceps Kraatz, 1859	Introduced	Non-endemic			1		1				1	1
Lithocharis ochracea (Gravenhorst, 1802)	Introduced	Non-endemic				1				1	1	1		Medon (Lithocharis) ochraceus Gravenhorst
Lobrathium multipunctum (Gravenhorst, 1802)	Native	Non-endemic	1													Lobrathium multipunctatum multipunctatum (Gravenhorst)
Medon apicalis (Kraatz, 1857)	Native	Non-endemic				1	1			1	1			Lithocharis apicalis Kraatz
Medon dilutus quadriceps (Wollaston, 1864)	Introduced	Non-endemic									1
Medon ripicola (Kraatz, 1854)	Native	Non-endemic									1	1		Lithocharis ripicola Kraatz
Medon varamontis Assing, 2013	Endemic	Endemic									1
Megalinus glabratus (Gravenhorst, 1802)	Native	Non-endemic						1
Megalinus hesperius (Erichson, 1839)	Native	Non-endemic				1		1			1			Xantholinus hesperius Erichson	Xantholinus glabratus Gravenhorst
Meotica exilis (Gravenhorst, 1806)	Native	Non-endemic									1
Myrmecocephalus concinnus (Erichson, 1839)	Introduced	Non-endemic cosmopolitan			1					1	1			Falagria concinna Erichson, 1840
Myrmecopora sulcata (Kiesenwetter, 1850)	Introduced	Non-endemic					1					1	Myrmecopora lohmanderi Bernhauer	Xenusa sulcata (Kiesenwetter)
Myrmecopora uvida (Erichson, 1840)	Introduced	Non-endemic										1		Xenusa uvida (Erichson)
Nacaeus impressicollis (Motschulsky, 1858)	Introduced	Non-endemic								1	1			Lispinus impressicolis Motschulsky
Nehemitropia lividipennis (Mannerheim, 1830)	Introduced	Non-endemic cosmopolitan			1	1	1	1		1	1	1	Acrotona sordida (Marsham); Nehemitropia sordida (Marsham)		Homolota melanaria Sahlberg
Neobisnius lathrobioides (Baudi di Selve, 1848)	Introduced	Non-endemic									1
Neobisnius procerulus procerulus (Gravenhorst, 1806)	Introduced	Non-endemic				1									Philonthus filiformis Wollaston
Notothecta caprariensis (Israelson, 1985)	Endemic	Doubtfully endemic									1			Atheta caprariensis (Israelson, 1985)
Notothecta dryochares (Israelson, 1985)	Endemic	Endemic				1	1	1	1	1	1	1		Atheta dryochares (Israelson, 1985)
Ocypus aethiops (Waltl, 1835)	Native	Non-endemic			1	1		1	1	1	1			Pseudocypus aethiops (Waltl); Staphylinus (Staphylinus) aethiops Waltl
Ocypus olens (Müller, 1764)	Native	Non-endemic		1	1	1	1	1	1	1	1	1		Staphylinus (Goericus) olens Müller; Staphylinus (Ocypus) olens Müller
Oligota parva Kraatz, 1862	Introduced	Non-endemic			1	1	1			1	1	1
Oligota pumilio Kiesenwetter, 1858	Native	Non-endemic			1	1	1	1		1	1	1
Oligota pusillima (Gravenhorst, 1806)	Introduced	Non-endemic cosmopolitan			1	1				New PRIBES	1	1
Oxypoda lurida Wollaston, 1857	Native	Non-endemic								1		1
Oxytelus sculptus Gravenhorst, 1806	Introduced	Non-endemic cosmopolitan			1	1	1		1	1	1	1		Anotylus sculptus (Gravenhorst)
Paraphloeostiba gayndahensis (MacLeay, 1871)	Introduced	Non-endemic				1				1	1	New PRIBES
Phacophallus parumpunctatus (Gyllenhal, 1827)	Introduced	Non-endemic cosmopolitan					1					1		Leptacinus parumpunctatus (Gyllenhal)
Philonthus concinnus (Gravenhorst, 1802)	Introduced	Non-endemic									1		Philonthus ochropus (Gravenhorst)
Philonthus discoideus (Gravenhorst, 1802)	Introduced	Non-endemic cosmopolitan				1	1		1	1	1	1
Philonthus fenestratus Fauvel, 1872	Introduced	Non-endemic								1	1	1
Philonthus longicornis Stephens, 1832	Introduced	Non-endemic cosmopolitan								New LAND-USE			Philonthus scybalarius (Nordmann)	Spatulonthus longicornis (Stephens)
Philonthus politus (Linnaeus, 1758)	Introduced	Non-endemic cosmopolitan			1	1	1	1		1		1	Philonthus aeneus (Rossi)
Philonthus quisquiliarius quisquiliarius (Gyllenhal, 1810)	Introduced	Non-endemic								1	1
Philonthus rectangulus Sharp, 1874	Introduced	Non-endemic			1			1	1
Philonthus umbratilis (Gravenhorst, 1802)	Introduced	Non-endemic				1				1	1
Philonthus ventralis (Gravenhorst, 1802)	Native	Non-endemic cosmopolitan				1		1	1		1	1	Philonthus ventralis proximus Wollaston		Philonthus immundus (Gyllenhal); Philonthus rufipes (Stephens)
Phloeonomus punctipennis Thomson, 1867	Native	Non-endemic			1	1	1	1	1	1	1	1
Phloeonomus pusillus (Gravenhorst, 1806)	Native	Non-endemic			1	1	1					1		Homalium pusillum Gravenhorst
Phloeopora corticalis corticalis (Gravenhorst, 1802)	Native	Non-endemic			1		1			New PRIBES		1	Phloeopora corticina Wollaston
Phloeopora teres (Gravenhorst, 1802)	Introduced	Non-endemic					1				1
Phloeopora testacea (Mannerheim, 1830)	Introduced	Non-endemic						1		1
Phloeostiba azorica (Fauvel, 1900)	Endemic	Endemic			1		1	1	1	1	1			Phloeonomus azoricus Fauvel	Homalium clavicorne Wollaston
Phytosus schatzmayri Bernhauer, 1941	Endemic	Doubtfully endemic									1					Phytosus schatzmayeri Bernhauer, 1941
Platystethus nitens (Sahlberg, 1832)	Native	Non-endemic			1	1				1	1	1
Platystethus spinosus Erichson, 1840	Native	Non-endemic				1				1
Proteinus atomarius Erichson, 1840	Native	Non-endemic			1	1	1	1	1	1	1	1				Proteinus atomanius Erichson
Pseudomedon obscurellus (Erichson, 1840)	Native	Non-endemic				1				New PRIBES	1			Lithocharis (Pseudomedon) obscurella Erichson
Pseudoplectus perplexus (Jacquelin du Val, 1854)	Native	Non-endemic			1					1	1	1
Quedius curtipennis Bernhauer, 1908	Native	Non-endemic				1	1		1	1	1	1
Quedius fuliginosus (Gravenhorst, 1802)	Native	Non-endemic			1						1	1
Quedius simplicifrons Fairmaire, 1862	Native	Non-endemic			1	1	1	1	1	1	1	1	Quedius hispanicus Bernhauer
Rugilus orbiculatus (Paykull, 1789)	Native	Non-endemic			1	1	1	1	1	1	1	1	Stilicus affinis Erichson	Stilicus orbiculatus (Paykull)
Scopaeus minutus Erichson, 1840	Native	Non-endemic									1
Scopaeus portai Luze, 1910	Native	Non-endemic				1				New BALA	1	New BALA
Sepedophilus littoreus (Linnaeus, 1758)	Native	Non-endemic									1
Sepedophilus lusitanicus Hammond, 1973	Native	Non-endemic			1	1	1	1	1	1	1	1			Conosoma pubescens Gravenhorst; Conosoma sericeum Latreille.
Sepedophilus testaceus (Fabricius, 1792)	Native	Non-endemic			1		1	1			1			Conosoma testaceum (Fabricius)
Stenichnus tythonus tythonus (Reitter, 1884)	Native	Non-endemic					1					1			Stenichnus tythonus mesmini Croissandeau
Stenomastax madeirae Assing, 2003	Native (Macaronesia)	Non-endemic						1		1
Stenus guttula guttula Müller, 1821	Native	Non-endemic			1	1			1	1	1	1
Sunius propinquus (Brisout de Barneville, 1867)	Native	Non-endemic			1	1	1	1		1	1	1		Hypomedon propinquus Brisout de Barneville; Medon (Hypomedon) propinquus Brisout de Barneville	Lithocharis ruficollis Kraatz
Tachyporus caucasicus Kolenati, 1846	Introduced	Non-endemic										1
Tachyporus chrysomelinus (Linnaeus, 1758)	Introduced	Non-endemic			1	1		1		1	1	1
Tachyporus dispar (Paykull, 1789)	Introduced	Non-endemic			1						1
Tachyporus nitidulus (Fabricius, 1781)	Introduced	Non-endemic			1	1	1	1		1	1	1
Thecturota tenuissima Casey, 1893	Introduced	Non-endemic								New AGRO
Trichiusa robustula Casey, 1893	Introduced	Non-endemic			1		1	1	1	1		1	Trichiusa immigrata Lohse, 1984
Trichophya pilicornis (Gyllenhal, 1810)	Native	Non-endemic								1	1
Xantholinus linearis linearis (Olivier, 1795)	Introduced	Non-endemic		1		1			1	1	1
Xantholinus longiventris Heer, 1839	Introduced	Non-endemic			1	1	1	1	1	1	1	1	Xantholinus longiventris miguelensis (Méquignon)
